# Supplementary material for: Metal–organic framework-derived nanoflower and nanoflake metal oxides as electrocatalysts for methanol oxidation
Source: Royal Society of Chemistry journal article supplement (doi:10.1039/d4ra04902k), 2024-01-01

**Metal Organic Frameworks-Derived Nanoflowers and Nanoflakes Metal Oxides as  
Electrocatalysts for Methanol Oxidation**

W. Kamal<sup>1</sup>, Abeer Enaiet Allah<sup>1</sup>, Rehab Mahmoud<sup>1</sup>, Ahmed A. Farghali<sup>2</sup>, Amna A. Kotp<sup>2</sup>,  
Abdalla Abdelwahab<sup>3,1,\*</sup>

<sup>1</sup>Department of Chemistry, Faculty of Science, Beni-Suef University, 62514 Beni-Suef,  
Egypt.

<sup>2</sup>Materials Science and Nanotechnology Department, Faculty of Postgraduate Studies for  
Advanced Science (PSAS), Beni-Suef University, 62511, Beni-Suef, Egypt.

<sup>3</sup>Department of Chemistry, College of Sciences, University of Ha'il, Ha'il, 81451, Saudi  
Arabia.

\* Corresponding Author: E-mail: [aabdelwahab@psas.bsu.edu.eg](mailto:aabdelwahab@psas.bsu.edu.eg), [a.abdelsalam@uoh.edu.sa](mailto:a.abdelsalam@uoh.edu.sa)

Table S1: EDS results as a table of MOFP1, MOFP2 and MOFP3.

For MOFP1

| Element | Weight % | Atomic % | Net Int. | Error % | Kratio | Z      | A      | F      |
|---------|----------|----------|----------|---------|--------|--------|--------|--------|
| C K     | 11.34    | 23.59    | 413.55   | 11.23   | 0.0338 | 1.1773 | 0.2531 | 1.0000 |
| O K     | 35.56    | 55.53    | 3490.82  | 7.57    | 0.1651 | 1.1314 | 0.4103 | 1.0000 |
| CuK     | 53.10    | 20.88    | 2110.90  | 2.91    | 0.4562 | 0.8464 | 1.0073 | 1.0078 |

For MOFP2

| Element | Weight % | Atomic % | Net Int. | Error % | Kratio | Z      | A      | F      |
|---------|----------|----------|----------|---------|--------|--------|--------|--------|
| C K     | 50.36    | 66.60    | 2895.84  | 7.41    | 0.2261 | 1.0649 | 0.4215 | 1.0000 |
| O K     | 27.91    | 27.72    | 1348.85  | 10.06   | 0.0609 | 1.0201 | 0.2139 | 1.0000 |
| NiK     | 12.05    | 3.26     | 582.27   | 4.43    | 0.1027 | 0.7914 | 1.0140 | 1.0617 |
| CuK     | 9.68     | 2.42     | 367.22   | 5.48    | 0.0758 | 0.7508 | 1.0117 | 1.0308 |

For MOFP3

| Element | Weight % | Atomic % | Net Int. | Error % | Kratio | Z      | A      | F      |
|---------|----------|----------|----------|---------|--------|--------|--------|--------|
| C K     | 63.50    | 73.58    | 6024.57  | 5.46    | 0.3901 | 1.0321 | 0.5952 | 1.0000 |
| O K     | 28.13    | 24.47    | 1336.02  | 11.15   | 0.0501 | 0.9870 | 0.1802 | 1.0000 |
| CoK     | 5.25     | 1.24     | 338.38   | 6.13    | 0.0437 | 0.7362 | 1.0176 | 1.1093 |
| NiK     | 1.49     | 0.35     | 85.90    | 18.17   | 0.0126 | 0.7605 | 1.0158 | 1.0916 |
| CuK     | 1.63     | 0.36     | 75.66    | 14.76   | 0.0130 | 0.7213 | 1.0107 | 1.0910 |

Table S2: Tafel slopes of MOFP1, MOFP2 and MOFP3 at 0.7 V and ECSA .

| Catalyst | Tafel slop at 0.7 V | ECSA   |
|----------|---------------------|--------|
| Mofp1    | 0.27                | 114    |
| Mofp2    | 0.31                | 310.25 |
| Mofp3    | 0.28                | 30.25  |

**Fig S1: TEM images of MOFP2 (a) HR-TEM images of MOFP2 (b).**

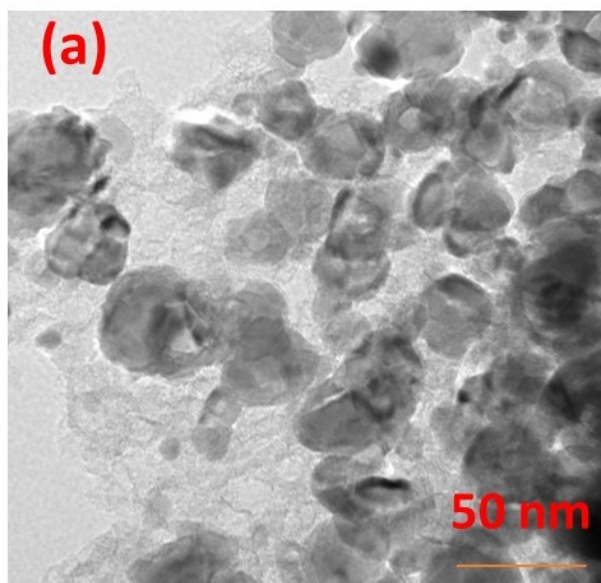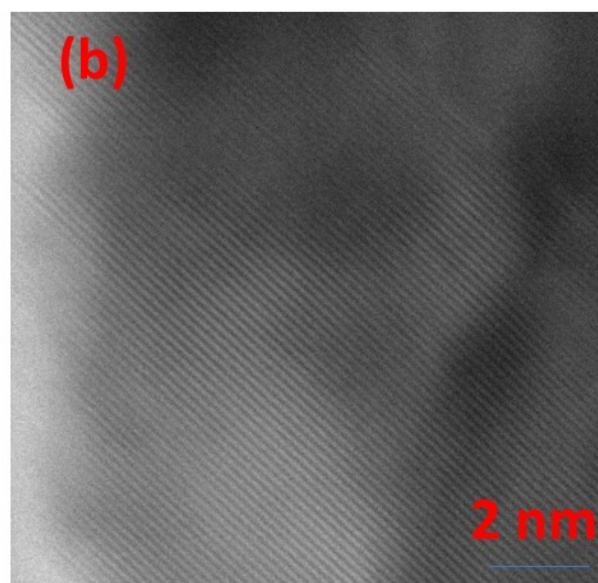

Fig S2 . CV curves of (a) MOFP1 (b) MOFP2, (c) MOFP catalysts in 01M NaOH with 1.0M MeOH at a scan rate 60 mV·s<sup>-1</sup>

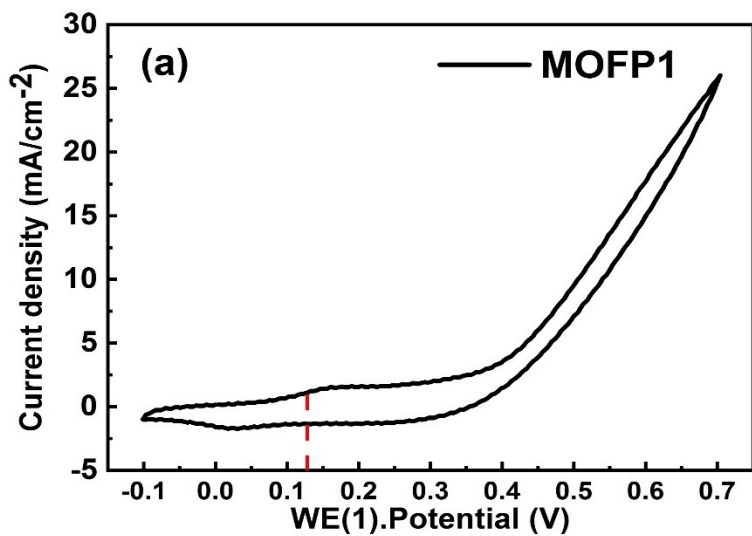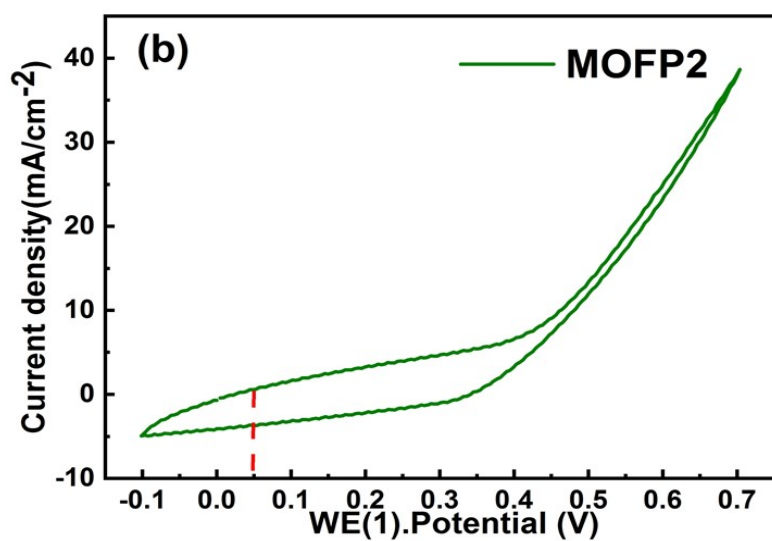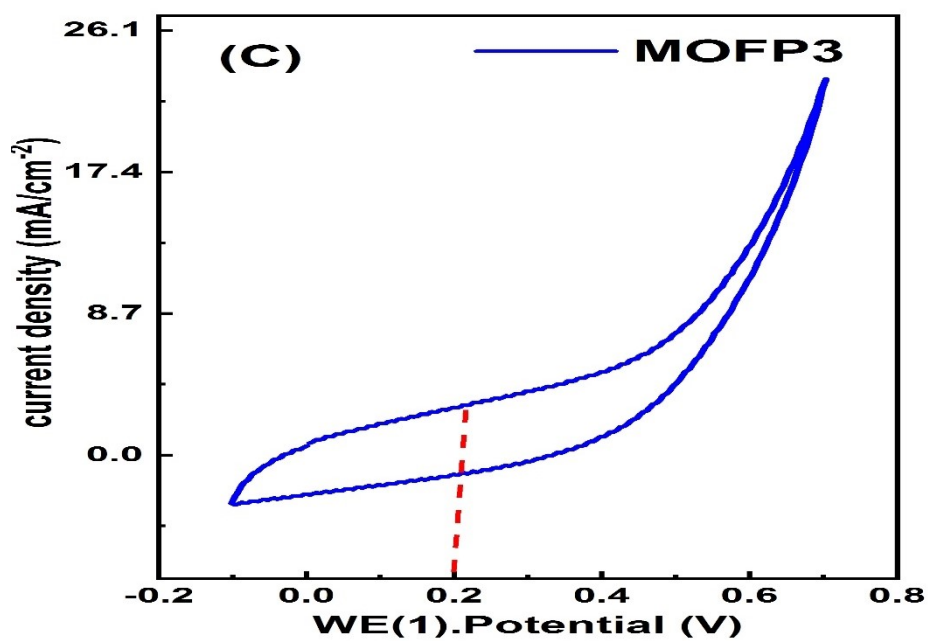

**Fig S 3. (a)** The relation between the square root of the scan rates and the anodic current density for MOFP1, MOFP2 and MOFP3. **(b)** Tafel plots of MOFP1 , MOFP2 and MOFP3 in 1 M NaOH 1 M methanol at 60 mV/s.

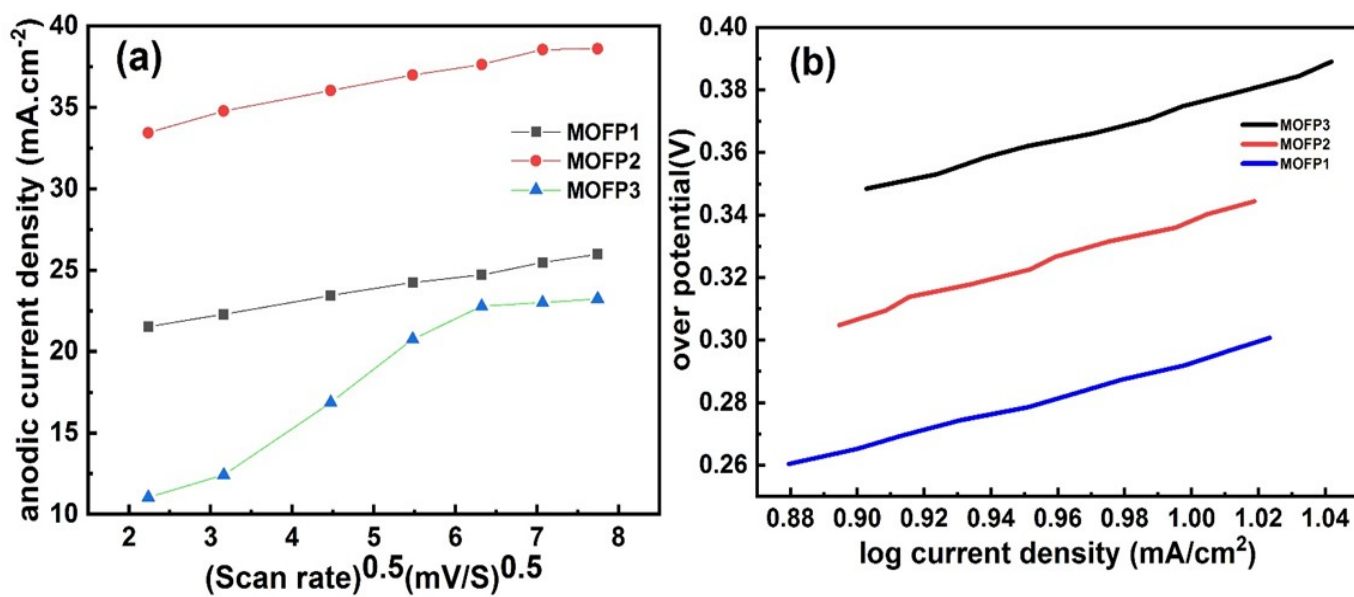

**Fig S4:** CVs in the double layer region for electrodes based MOFS(a)MOFP1, (c)MOFP2 and (e)MOFP3 at scan rates of 20,30,40,50 and 60 mV s<sup>-1</sup> in the non-faradaic range of 0-0.1 V vs. Hg/HgO. , (b), (d) and (f) Corresponding linear fit of the capacitive current vs. scan rates to calculate C<sub>dl</sub> and ECSA.

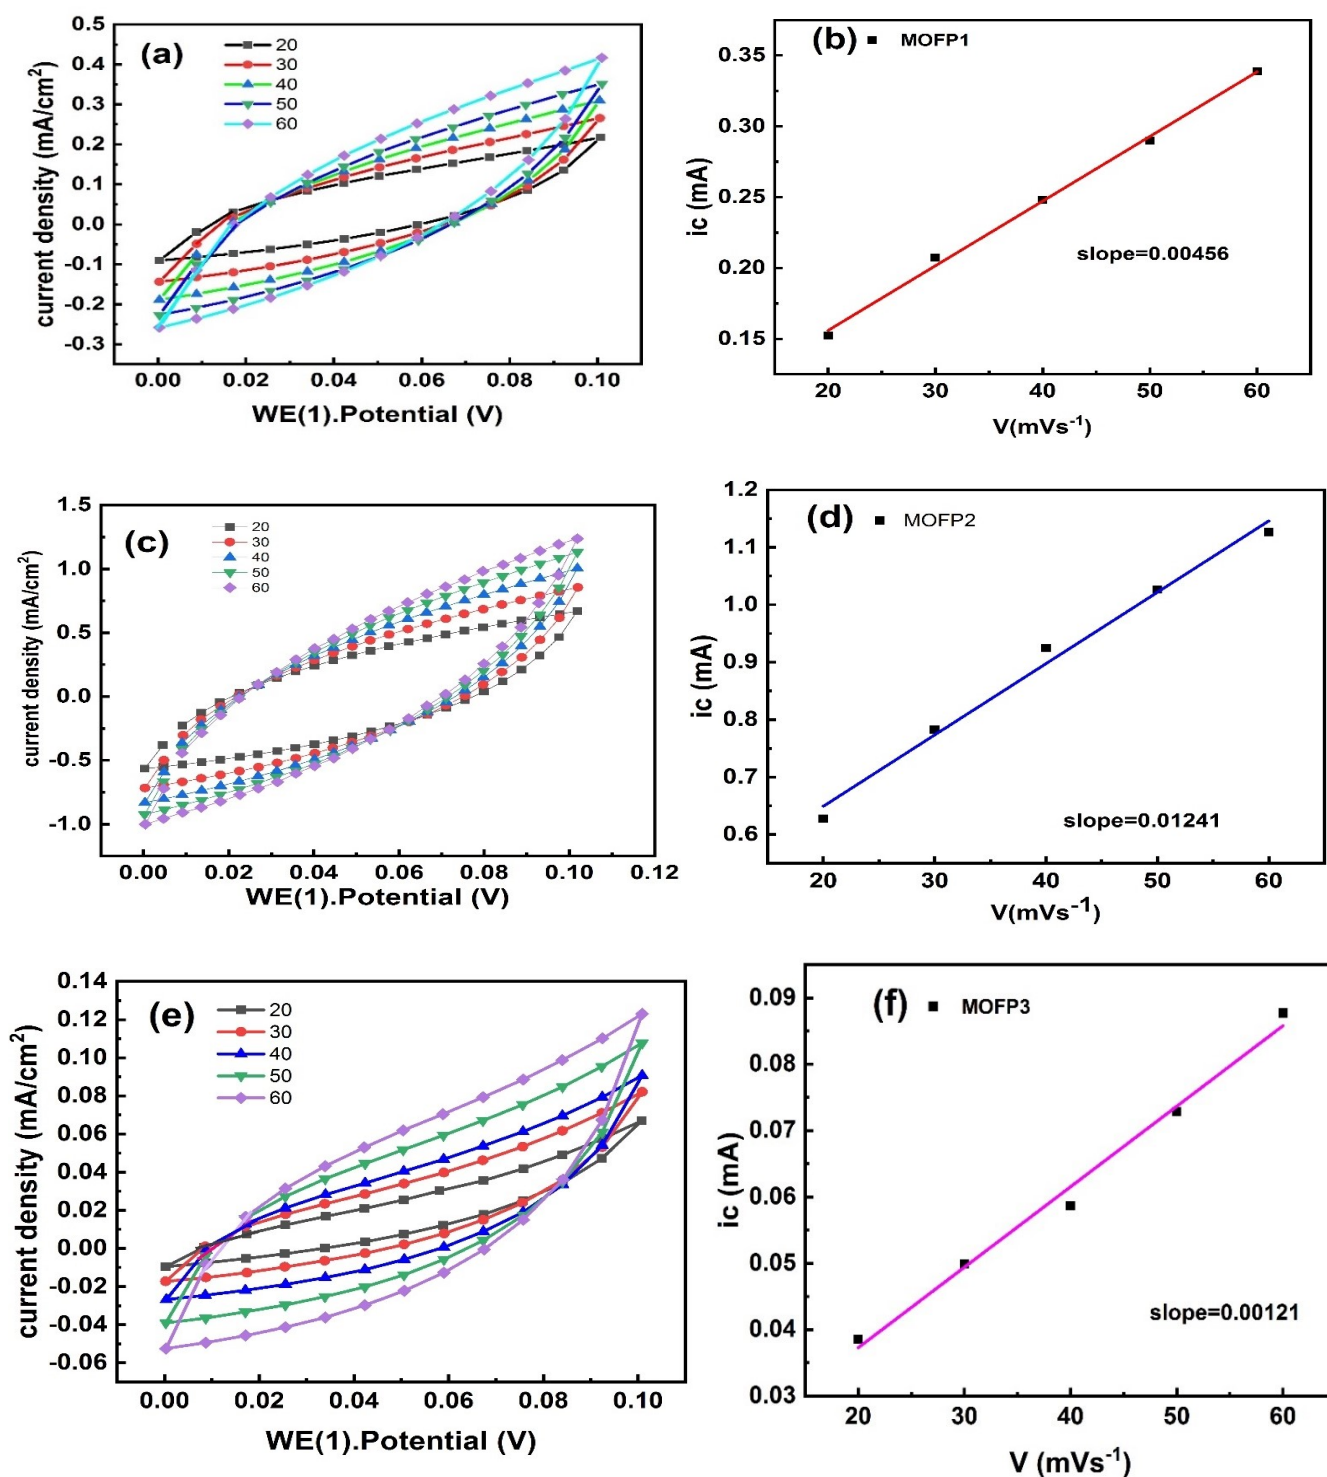

Fig S5: TEM images of MOFP2 (a) HR-TEM images of MOFP2 after methanol oxidation.

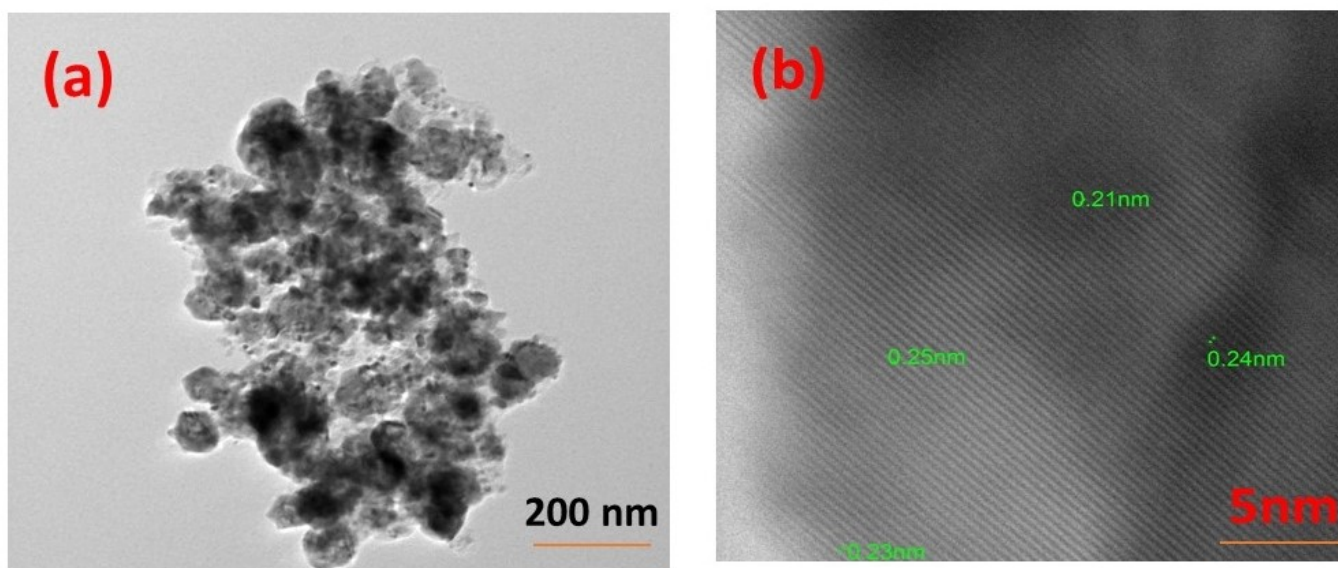

Fig S6: the cyclic voltammetry of the sample after 1 cycle and 1500 cycles:

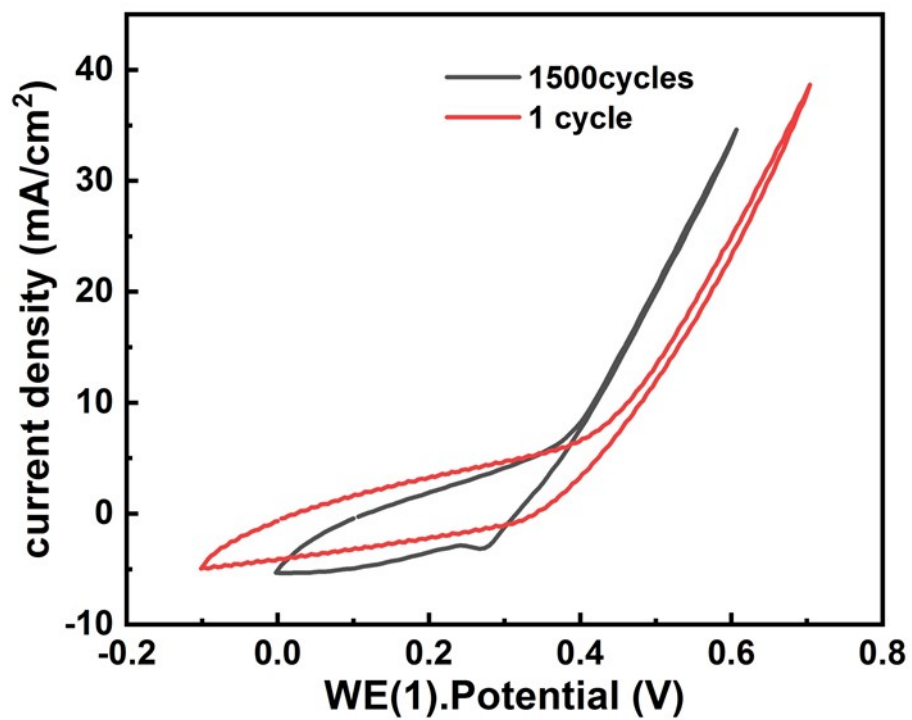

Supplement: d4ra04902k1.pdf [file d4ra04902k1.pdf]
